# Supplementary material for: Testing and evaluation of Pakistan’s pioneer disaster risk communication app: a case study of PDMA Madadgar android-based app
Source: Frontiers journal article supplement (doi:10.3389/fcomm.2025.1572206), 2025-06-26
Supplement: Table_1.xlsx [file Table_1.xlsx]

## Sheet: Main Menue
	Variable Name	Egnlish Text	Urdu text			Variable Name		Text
	S_dw	Daily Weather	آج کا موسم		<string name="		">		</string>
	s_ew	Early Warning	ارلی وارننگ /پیشگی اطلاع
	s_dsr	Daily Situation Report	رزمرہ صورتحال کی رپورٹ
	s_rd	Report Disaster	آفت کے بارے میں رپورٹ کریں
	s_ec	Evacuation Centre	محفوظ پناگاہیں
	s_rna	Rapid Need Assessment	آفت کے پوری بعد بنیادی ضروریات کا تعین
	s_dna	Damage Need Assessment	نقصانات کا تعین اور تخمینہ
	s_rar	Risk Assessment Results	رسک اسسمنٹ کے نتایج
	s_erc	Emergency Contacts	ايمرجنسی رابطہ نمبر
	s_lec	Locate Evacuation Centre	محفوظ پناگاہ تلاش کریں
	s_co	Community Outreach	کمیونٹی آوٹریچ
	s_ql	Qucik Links	کارآمد لنک
	s_logout	Logout	لاگ آوٹ کریں
	s_login	Login	لاگ ان کریں
	s_urdu	Urdu	اردو
	s_english	Enlgish	انگریزی
	s_h_ass	Assessments	اسسمنٹ
	s_h_ps	Public Services	عوامی خدمات
	s_h_set	Settings	ترتیبات
	s_h_lang	Select Language	زبان منتخب کریں

## Sheet: Pop Message and notes 
	Variable Name	Egnlish Text	Urdu text			Variable Name		Text
	s_g_dec	I hereby undertake that all of the above information are authentic. I further declare that i am not reporting false data to the Provincial Disaster Management Authority, KP	میں حلفیہ اقرار کرتا​​/کرتی ہوں کہ مندرجہ معلومات مستند معلومات ہیں- میں مزید اقرار کرتا​​/کرتی ہوں کہ میں صوبائی ڈیزاسٹر مینجمنٹ اتھارٹی خیبر پختونخواہ کو غلط معلومات رپورٹ نہیں کر رہا-		<string name="	s_g_dec	">	میں حلفیہ اقرار کرتا​​/کرتی ہوں کہ مندرجہ معلومات مستند معلومات ہیں- میں مزید اقرار کرتا​​/کرتی ہوں کہ میں صوبائی ڈیزاسٹر مینجمنٹ اتھارٹی خیبر پختونخواہ کو غلط معلومات رپورٹ نہیں کر رہا-	</string>
	s_g_note	In case of false reporting, the concerned authority can impose punishment as per National Disaster Management Act-2010	غلط رپورٹنگ کی صورت میں متعلقہ اتھارٹی نیشنل ڈیزاسٹر مینجمنٹ ایکٹ2010 کے تحت آپ پر سزا عائد کرسکتی ہے-		<string name="	s_g_note	">	غلط رپورٹنگ کی صورت میں متعلقہ اتھارٹی نیشنل ڈیزاسٹر مینجمنٹ ایکٹ2010 کے تحت آپ پر سزا عائد کرسکتی ہے-	</string>
	s_g_rna	This section is practically dedicated to immediate needs of the survivors following an emergency situation. Please make sure to share accurate demands as per the need of the affected communities.	یہ حصہ عملی طور پر آفات کے پوری بعد بنیادی ضروریات کی تعین کے لئے وقف ہے۔ براہ کرم متاثرہ لوگوں کی ضرورت کے مطابق درست مطالبات مہیا کرنا یقینی بنائیں۔		<string name="	s_g_rna	">	یہ حصہ عملی طور پر آفات کے پوری بعد بنیادی ضروریات کی تعین کے لئے وقف ہے۔ براہ کرم متاثرہ لوگوں کی ضرورت کے مطابق درست مطالبات مہیا کرنا یقینی بنائیں۔	</string>
	s_g_subnote	Your report successfully submitted to PDMA Emergency Operation Centre. Thanks	آپ کی رپورٹ پی ڈی ایم اے ایمرجنسی آپریشن سنٹر کو موصول ہویی- شکریہ		<string name="	s_g_subnote	">	آپ کی رپورٹ پی ڈی ایم اے ایمرجنسی آپریشن سنٹر کو موصول ہویی- شکریہ	</string>
	s_g_crnt_loc	Current Location	موجودہ لوکیشن کیلیے کلک کریں-		<string name="	s_g_crnt_loc	">	موجودہ لوکیشن کیلیے کلک کریں-	</string>
	s_g_lat	Latitude	طول		<string name="	s_g_lat	">	طول	</string>
	s_g_lon	Longitude	طول البلد		<string name="	s_g_lon	">	طول البلد	</string>
	s_g_h_dec	Declaration	اعلامیہ		<string name="	s_g_h_dec	">	اعلامیہ	</string>
	s_g_h_note	Note	نوٹ		<string name="	s_g_h_note	">	نوٹ	</string>
	s_g_submite	Submite	جمع کرائیں		<string name="	s_g_submite	">		</string>

## Sheet: Registration
	English	Urdu	Section
	Email		login
	Password
	Login
	Signup
	All Right Reserverd Mobilise Project Pakistan
	Create Account		SignUp
	Name
	CNIC
	Enter your CNIC with out Dashes
	Mobile Number
	Email id
	this will be your Username
	Password
	this will be your password
	Regsiter as
	Citizen
	Volunteer
	PDMA Staff
	Signup		Validation Messages
	Please Select District
	Please enter Complete Address
	Please enter full name

## Sheet: Report Disaster 
	Variable Name	Question English	Question Udru	Response	Code	Section English	Section Urdu
	rd1	Select District	ضلع منتخب کریں
	rd2	Select Tehsil	تحصیل منتخب کریں
	rd3	Enter Complete Address	مکمل پتہ درج کریں
	rd4	Type of Disaster	آفت کی قسم
	rd5	Detail of Disaster	آفت کی تفصیل
	rd6a	picture1	تصویر 1			Image	تصویر
	rd6b	picture2	تصویر 2
	rd6c	picture3	تصویر 3

## Sheet: Rapid Need Assesment
	Variable Name	Egnlish Text	Egnlish urdu	Response	Code	Section	Section Urdu		Variable Name		Text
	rna1	Select District	ضلع منتخب کریں					<string name="	rna1	">	ضلع منتخب کریں	</string>
	rna2	Select Tehsil	تحصیل منتخب کریں					<string name="	rna2	">	تحصیل منتخب کریں	</string>
	rna3	Enter Complete Address	مکمل پتہ درج کریں					<string name="	rna3	">	مکمل پتہ درج کریں	</string>
	rna4	Type of Disaster	آفت کی قسم					<string name="	rna4	">	آفت کی قسم	</string>
	rna5a	Emergency Evacuation	ہنگامی انخلا			Immediates Needs	ابتدائی ضروریات	<string name="	rna5a	">	ہنگامی انخلا	</string>
	rna5b	Shelter/tents	پناہ گاہ /خیمہ					<string name="	rna5b	">	پناہ گاہ /خیمہ	</string>
	rna5c	Medical First Aid	ابتدائی طبی امداد					<string name="	rna5c	">	ابتدائی طبی امداد	</string>
	rna5d	Food item	کھانے کے اشیا					<string name="	rna5d	">	کھانے کے اشیا	</string>
	rna5e	Water and Sanitation	پانی اور صفائی					<string name="	rna5e	">	پانی اور صفائی	</string>
	rna5f	Bridge Repair	پل کی مرمت					<string name="	rna5f	">	پل کی مرمت	</string>
	rna5g	Roads Rehabilitation	سڑکوں کی بحالی					<string name="	rna5g	">	سڑکوں کی بحالی	</string>

## Sheet: Demage Need Assesment
	Variable Name	Question Egnlish Text	Urdu Egnlish Text	Response English	Response urdu	Code	Section English	Section Urdu	String name	Variable Name		Text
	dna1	Select District	ضلع منتخب کریں						<string name="	dna1	">	ضلع منتخب کریں	</string>
	dna2	Select Tehsil	تحصیل منتخب کریں						<string name="	dna2	">	تحصیل منتخب کریں	</string>
	dna3	Enter Complete Address	مکمل پتہ درج کریں						<string name="	dna3	">	مکمل پتہ درج کریں	</string>
	dna4	Name	نام						<string name="	dna4	">	نام	</string>
	dna5	Father Name	والد کا نام						<string name="	dna5	">	والد کا نام	</string>
	dna6	CNIC #	شناختی کارڈ نمبر						<string name="	dna6	">	شناختی کارڈ نمبر	</string>
	dna7	Phone Number	فون نمبر						<string name="	dna7	">	فون نمبر	</string>
	dna8a	Number of People Injured	زخمی افراد کی تعداد				Casualiteis	کیجولٹی:​​ جاں بحق اور زخمیوں کی تعداد	<string name="	dna8a	">	زخمی افراد کی تعداد	</string>
	dna8b	Number of People Died	مرنے والوں کی تعداد						<string name="	dna8b	">	مرنے والوں کی تعداد	</string>
	dna9	House	مکان	No Damage	کوئی نقصان نہیں	1	Damages to Properties	املاک کو پہنچنے والے نقصانات	<string name="	dna9	">	مکان	</string>
				Partial Damages	جزوی نقصان	2			<string name="	dna9a	">	کوئی نقصان نہیں	</string>
				Fully Damaged	مکمل طور پر تباہ ہوا	3			<string name="	dna9b	">	جزوی نقصان	</string>
	dna10	Construction type of house	مکان کی تعمیر کی قسم	Adobe/Kacha House	کچا مکان	1			<string name="	dna10	">	مکان کی تعمیر کی قسم	</string>
				Masonry/Pakka	پکا مکان	2			<string name="	dna10a	">	کچا مکان	</string>
	dna11	Ownership Status of House	مکان کی ملکیت	Owener	ذاتی ملکیت	1			<string name="	dna11	">	مکان کی ملکیت	</string>
				Rented	کرایا دار	2			<string name="	dna11a	">	ذاتی ملکیت	</string>
	dna12a	Damage to Agriculture Crops	زراعتی فصلوں کو نقصان				Livelihood	ذریعہ معاش	<string name="	dna12a	">	زراعتی فصلوں کو نقصان	</string>
	dna12b	Horticulture	باغات						<string name="	dna12b	">	باغات	</string>
	dna12c	Communal Forest	مشترکہ جنگل						<string name="	dna12c	">	مشترکہ جنگل	</string>
	dna12d	Livestock	مال مویشی						<string name="	dna12d	">	مال مویشی	</string>
	dna12e	Any Other	دیگر (درج کریں)						<string name="	dna12e	">	دیگر (درج کریں)	</string>
	dna13a	Shop	دکان/دکانات				Property	پراپرٹی/ املاک	<string name="	dna13a	">	دکان/دکانات	</string>
	dna13b	Hotel	ہوٹل						<string name="	dna13b	">	ہوٹل	</string>
	dna13c	Petrol Pump	پٹرول پمپ						<string name="	dna13c	">	پٹرول پمپ	</string>
	dna13d	Any Other	دیگر (درج کریں)						<string name="	dna13d	">	دیگر (درج کریں)	</string>
	dna14a	Repair	مرمت				Estimated Damages in Rupees	نقصانات کا تخمینہ	<string name="	dna14a	">	مرمت	</string>
	dna14b	Content	گھریلوں سامان						<string name="	dna14b	">	گھریلوں سامان	</string>
	dna14c	Total	ٹوٹل						<string name="	dna14c	">	ٹوٹل	</string>
	dna15	Any other comments	کوئی اور تبصرہ​​ یاکمنٹس						<string name="	dna15	">	کوئی اور تبصرہ​​ یاکمنٹس	</string>

## Sheet: Districts Names
	Districts Name
3	Peshawar			listDistrict .add("	Peshawar	");		<option >	Peshawar	</option>
4	Charsadda			listDistrict .add("	Charsadda	");		<option >	Charsadda	</option>
5	Nowshera			listDistrict .add("	Nowshera	");		<option >	Nowshera	</option>
6	Mohmand			listDistrict .add("	Mohmand	");		<option >	Mohmand	</option>
7	Khyber			listDistrict .add("	Khyber	");		<option >	Khyber	</option>
8	Mardan			listDistrict .add("	Mardan	");		<option >	Mardan	</option>
9	Swabi			listDistrict .add("	Swabi	");		<option >	Swabi	</option>
10	Buner			listDistrict .add("	Buner	");		<option >	Buner	</option>
11	Upper Dir			listDistrict .add("	Upper Dir	");		<option >	Upper Dir	</option>
12	Swat			listDistrict .add("	Swat	");		<option >	Swat	</option>
13	Shangla			listDistrict .add("	Shangla	");		<option >	Shangla	</option>
14	Malakand			listDistrict .add("	Malakand	");		<option >	Malakand	</option>
15	Lower Dir			listDistrict .add("	Lower Dir	");		<option >	Lower Dir	</option>
16	Chitral Lower			listDistrict .add("	Chitral Lower	");		<option >	Chitral Lower	</option>
17	Chitral Upper			listDistrict .add("	Chitral Upper	");		<option >	Chitral Upper	</option>
18	Bajaur			listDistrict .add("	Bajaur	");		<option >	Bajaur	</option>
19	Hangu			listDistrict .add("	Hangu	");		<option >	Hangu	</option>
20	Karak			listDistrict .add("	Karak	");		<option >	Karak	</option>
21	Kohat			listDistrict .add("	Kohat	");		<option >	Kohat	</option>
22	Kurram			listDistrict .add("	Kurram	");		<option >	Kurram	</option>
23	Orakzai			listDistrict .add("	Orakzai	");		<option >	Orakzai	</option>
24	Mansehra			listDistrict .add("	Mansehra	");		<option >	Mansehra	</option>
25	Abbottabad			listDistrict .add("	Abbottabad	");		<option >	Abbottabad	</option>
26	Battagram			listDistrict .add("	Battagram	");		<option >	Battagram	</option>
27	Haripur			listDistrict .add("	Haripur	");		<option >	Haripur	</option>
28	Lower Kohistan			listDistrict .add("	Lower Kohistan	");		<option >	Lower Kohistan	</option>
29	Torghar			listDistrict .add("	Torghar	");		<option >	Torghar	</option>
30	Upper Kohistan			listDistrict .add("	Upper Kohistan	");		<option >	Upper Kohistan	</option>
31	Kolai Palas			listDistrict .add("	Kolai Palas	");		<option >	Kolai Palas	</option>
32	Dera Ismail Khan			listDistrict .add("	Dera Ismail Khan	");		<option >	Dera Ismail Khan	</option>
33	Tank			listDistrict .add("	Tank	");		<option >	Tank	</option>
34	South Waziristan			listDistrict .add("	South Waziristan	");		<option >	South Waziristan	</option>
35	North Waziristan			listDistrict .add("	North Waziristan	");		<option >	North Waziristan	</option>
36	Lakki Marwat			listDistrict .add("	Lakki Marwat	");		<option >	Lakki Marwat	</option>

## Sheet: Tehsils
		Districts Name	Tehsils List
		3	Peshawar	3	Peshawar	3			3	Peshawar	3
		3	Town-1	3	Town-1	3			3	Town-1	3
		3	Town-2	3	Town-2	3			3	Town-2	3
		3	Town-3	3	Town-3	3			3	Town-3	3
		3	Town-4	3	Town-4	3			3	Town-4	3
		3	Peshawar	3	Peshawar	3			3	Peshawar	3
		4	Charsadda	4	Charsadda	4			4	Charsadda	4
		4	Shabqadar	4	Shabqadar	4			4	Shabqadar	4
		4	Tangay	4	Tangay	4			4	Tangay	4
		5	Jahangira	5	Jahangira	5			5	Jahangira	5
		5	Nowshera	5	Nowshera	5			5	Nowshera	5
		5	Pabbi	5	Pabbi	5			5	Pabbi	5
		6	Umber Utman Khel	6	Umber Utman Khel	6			6	Umber Utman Khel	6
		6	Halim Zai	6	Halim Zai	6			6	Halim Zai	6
		6	Pindiali	6	Pindiali	6			6	Pindiali	6
		6	Pran Ghar	6	Pran Ghar	6			6	Pran Ghar	6
		6	Safi	6	Safi	6			6	Safi	6
		6	Upper Mohmand	6	Upper Mohmand	6			6	Upper Mohmand	6
		6	Ekka Ghund	6	Ekka Ghund	6			6	Ekka Ghund	6
		7	Bara	7	Bara	7			7	Bara	7
		7	Jamrud	7	Jamrud	7			7	Jamrud	7
		7	Landi Kotal	7	Landi Kotal	7			7	Landi Kotal	7
		7	Mula Gori	7	Mula Gori	7			7	Mula Gori	7
		8	Mardan	8	Mardan	8			8	Mardan	8
		8	Takht Bhai	8	Takht Bhai	8			8	Takht Bhai	8
		8	Katlang	8	Katlang	8			8	Katlang	8
		8	Lund Khwar	8	Lund Khwar	8			8	Lund Khwar	8
		8	Rustam	8	Rustam	8			8	Rustam	8
		9	Lahor	9	Lahor	9			9	Lahor	9
		9	Razar	9	Razar	9			9	Razar	9
		9	Swabi	9	Swabi	9			9	Swabi	9
		9	Topi	9	Topi	9			9	Topi	9
		10	Daggar	10	Daggar	10			10	Daggar	10
		10	Ghara	10	Ghara	10			10	Ghara	10
		10	Khudu Khel	10	Khudu Khel	10			10	Khudu Khel	10
		10	Mandanr	10	Mandanr	10			10	Mandanr	10
		10	Chagarzai	10	Chagarzai	10			10	Chagarzai	10
		10	Gadizee	10	Gadizee	10			10	Gadizee	10
		11	Dir	11	Dir	11			11	Dir	11
		11	Sharingal	11	Sharingal	11			11	Sharingal	11
		11	Wari	11	Wari	11			11	Wari	11
		12	Babuzai	12	Babuzai	12			12	Babuzai	12
		12	Barikot	12	Barikot	12			12	Barikot	12
		12	Behrain	12	Behrain	12			12	Behrain	12
		12	Charbagh	12	Charbagh	12			12	Charbagh	12
		12	Kabal	12	Kabal	12			12	Kabal	12
		12	Khwaza Khela	12	Khwaza Khela	12			12	Khwaza Khela	12
		12	Matta	12	Matta	12			12	Matta	12
		13	Alpurai	13	Alpurai	13			13	Alpurai	13
		13	Besham	13	Besham	13			13	Besham	13
		13	Puran	13	Puran	13			13	Puran	13
		13	Chakesar	13	Chakesar	13			13	Chakesar	13
		14	Sam Rani Zai	14	Sam Rani Zai	14			14	Sam Rani Zai	14
		14	Swat Rani Zai	14	Swat Rani Zai	14			14	Swat Rani Zai	14
		15	Adenzai	15	Adenzai	15			15	Adenzai	15
		15	Lal Qilla	15	Lal Qilla	15			15	Lal Qilla	15
		15	Samarbagh	15	Samarbagh	15			15	Samarbagh	15
		15	Timergara	15	Timergara	15			15	Timergara	15
		16	Chitral	16	Chitral	16			16	Chitral	16
		17	Mastuj	17	Mastuj	17			17	Mastuj	17
		18	Bar Chamer Kand	18	Bar Chamer Kand	18			18	Bar Chamer Kand	18
		18	Barang	18	Barang	18			18	Barang	18
		18	Khar	18	Khar	18			18	Khar	18
		18	Loe Mamund	18	Loe Mamund	18			18	Loe Mamund	18
		18	Wara Mamund	18	Wara Mamund	18			18	Wara Mamund	18
		18	Nawagai	18	Nawagai	18			18	Nawagai	18
		18	Salarzai	18	Salarzai	18			18	Salarzai	18
		18	Utman khel	18	Utman khel	18			18	Utman khel	18
		19	Hangu	19	Hangu	19			19	Hangu	19
		19	Tall	19	Tall	19			19	Tall	19
		20	Banda Daud Shah	20	Banda Daud Shah	20			20	Banda Daud Shah	20
		20	Karak	20	Karak	20			20	Karak	20
		20	Takht-e-Nasrati	20	Takht-e-Nasrati	20			20	Takht-e-Nasrati	20
		21	Kohat	21	Kohat	21			21	Kohat	21
		21	Lachi	21	Lachi	21			21	Lachi	21
		22	Upper Kurram	22	Upper Kurram	22			22	Upper Kurram	22
		22	Central Kurram	22	Central Kurram	22			22	Central Kurram	22
		22	Lower Kurram	22	Lower Kurram	22			22	Lower Kurram	22
		23	Upper Orakzai	23	Upper Orakzai	23			23	Upper Orakzai	23
		23	Central Orakzai	23	Central Orakzai	23			23	Central Orakzai	23
		23	Lower Orakzai	23	Lower Orakzai	23			23	Lower Orakzai	23
		23	Ismail Zai	23	Ismail Zai	23			23	Ismail Zai	23
		24	Balakot	24	Balakot	24			24	Balakot	24
		24	Mansehra	24	Mansehra	24			24	Mansehra	24
		24	Oghi	24	Oghi	24			24	Oghi	24
		24	Baffa Pakhal	24	Baffa Pakhal	24			24	Baffa Pakhal	24
		24	Darband	24	Darband	24			24	Darband	24
		25	Abbottabad	25	Abbottabad	25			25	Abbottabad	25
		25	Havelian	25	Havelian	25			25	Havelian	25
		26	Allai	26	Allai	26			26	Allai	26
		26	Battagram	26	Battagram	26			26	Battagram	26
		27	Ghazi	27	Ghazi	27			27	Ghazi	27
		27	Haripur	27	Haripur	27			27	Haripur	27
		27	Khanpur	27	Khanpur	27			27	Khanpur	27
		28	Bankad	28	Bankad	28			28	Bankad	28
		28	Pattan	28	Pattan	28			28	Pattan	28
		29	Judba	29	Judba	29			29	Judba	29
		29	Khander	29	Khander	29			29	Khander	29
		30	Dassu	30	Dassu	30			30	Dassu	30
		30	Kandia	30	Kandia	30			30	Kandia	30
		31	Battera Kolai	31	Battera Kolai	31			31	Battera Kolai	31
		31	Palas	31	Palas	31			31	Palas	31
		32	Dera Ismail Khan	32	Dera Ismail Khan	32			32	Dera Ismail Khan	32
		32	Deraban	32	Deraban	32			32	Deraban	32
		32	Kulachi	32	Kulachi	32			32	Kulachi	32
		32	Paharpur	32	Paharpur	32			32	Paharpur	32
		32	Paroa	32	Paroa	32			32	Paroa	32
		33	Tank	33	Tank	33			33	Tank	33
		34	Birmal	34	Birmal	34			34	Birmal	34
		34	Ladha	34	Ladha	34			34	Ladha	34
		34	Makin	34	Makin	34			34	Makin	34
		34	Sararogha	34	Sararogha	34			34	Sararogha	34
		34	Serwekai	34	Serwekai	34			34	Serwekai	34
		34	Tiarza	34	Tiarza	34			34	Tiarza	34
		34	Toi khulla	34	Toi khulla	34			34	Toi khulla	34
		34	Wana	34	Wana	34			34	Wana	34
		35	Datta Khel	35	Datta Khel	35			35	Datta Khel	35
		35	Dossali	35	Dossali	35			35	Dossali	35
		35	Gharyum	35	Gharyum	35			35	Gharyum	35
		35	Ghulam Khan	35	Ghulam Khan	35			35	Ghulam Khan	35
		35	Mir Ali	35	Mir Ali	35			35	Mir Ali	35
		35	Miran Shah	35	Miran Shah	35			35	Miran Shah	35
		35	Razmak	35	Razmak	35			35	Razmak	35
		35	Shewa	35	Shewa	35			35	Shewa	35
		35	Spinwam	35	Spinwam	35			35	Spinwam	35
		35	Shawal	35	Shawal	35			35	Shawal	35
		36	Lakki Marwat	36	Lakki Marwat	36			36	Lakki Marwat	36
		36	Sarai Naurang	36	Sarai Naurang	36			36	Sarai Naurang	36
		38	Bannu	38	Bannu	38			38	Bannu	38
		38	Domel	38	Domel	38			38	Domel	38
		38	Kaki	38	Kaki	38			38	Kaki	38

## Sheet: Types of Disasters
		Earthquakes				<option >	Earthquakes	</option>
		Riverine Flood				<option >	Riverine Flood	</option>
		Flash Floods				<option >	Flash Floods	</option>
		Urban Flood				<option >	Urban Flood	</option>
		Glacial Lake Outburst Floods				<option >	Glacial Lake Outburst Floods	</option>
		Landslides				<option >	Landslides	</option>
		Drought				<option >	Drought	</option>
		Storm				<option >	Storm	</option>
		Desertification				<option >	Desertification	</option>
		Avalanche				<option >	Avalanche	</option>
		Settlement Fire				<option >	Settlement Fire	</option>
		Forest Fire				<option >	Forest Fire	</option>
		Torrential Rainfall				<option >	Torrential Rainfall	</option>
		Lightening				<option >	Lightening	</option>
		Hailstones				<option >	Hailstones	</option>
		Cloud Bursting				<option >	Cloud Bursting	</option>
		Snow Avalanches				<option >	Snow Avalanches	</option>
		Soil Erosion				<option >	Soil Erosion	</option>
		Snowfall				<option >	Snowfall	</option>
		Bomb Blast				<option >	Bomb Blast	</option>
		Epidemic Diseases				<option >	Epidemic Diseases	</option>
		Any Other

## Sheet: Evacuation Centres
Distid	Center Naem	lat	Distid	PK			District	Tehsil	Evacuation	Location	Latitude	Longitude
24	1	1	24	24			Mansehra	Mansehra	Regional Institute for Teacher Education	Main Shahrah e Resham, Near Ghazi Kot Town Ship, Mansehra.									Abbottabad	25
24	1	1	24	24			Mansehra	Mansehra	GPG College, Mansehra	Labor Kot College Doraha, Mansehra									Bajaur	18
24	1	1	24	24			Mansehra	Balakot	GHS Balakot City	Mansehra Naran Road									Bannu	38
24	1	1	24	24			Mansehra	Balakot	GD College Balakot	Hassa, Mansehra Naran Road									Battagram	26
24	1	1	24	24			Mansehra	Oghi	GD College for Boys, Oghi.	College Road Oghi									Chitral Lower	16
24	1	1	24	24			Mansehra	Oghi	Govt English Medium Secondary School, Oghi	Main Battagram Road.									Chitral Upper	17			4	Charsadda
26	1	1	26	26			Battagram	Battagram	Newly Constructed Social Welfare Building.	Shahrah e Resham, Chapargam Battagram									Hangu	19			10	Buner
26	1	1	26	26			Battagram	Battagram	GD College Battagram	College Road, Shahrah e Resham, Battagram									Haripur	27			11	Upper Dir
26	1	1	26	26			Battagram	Alai	Sports Ground, Alai	Kasai Bana, Kwand Road Alai									Karak	20			15	Lower Dir
29	1	1	29	29			Torghar	Hassan Zai	Sports Ground, Hassan Zai	Thakot Darband Road									Khyber	7			28	Lower Kohistan
28	1	1	28	28			Kohistan Lower	Pattan	GD College Pattan	WAPDA Colony Road, Pattan									Kohat	21			30	Upper Kohistan
28	1	1	28	28			Kohistan Lower	Pattan	GHSS, Pattan	Tehsil Road, Main Bazar Pattan									Kolai Palas	31			32	Dera Ismail Khan
28	1	1	28	28			Kohistan Lower	Pattan	GHS, Jijal	Karakorum Highway, Jijal									Kurram	22			36	Lakki Marwat
28	1	1	28	28			Kohistan Lower	Pattan	GHSS, Chakai	Karakorum Highway, Chakai									Malakand	14
30	1	1	30	30			Kohistan Upper	Dassu	Govt Centennial Model High School and Adjacent Ground, Dassu.	Karakorum Highway Road, Dassu City									Mansehra	24
30	1	1	30	30			Kohistan Upper	Dassu	Newly Constructed DHQ Hospital, Dassu	AC Colony Link Road, Karakorum Highway Dassu									Mardan	8
30	1	1	30	30			Kohistan Upper	Dassu	GHS Seo, Dassu	Dassu Seo Road, Seo									Mohmand	6
31	1	1	31	31			Kolai Palas	Batera	GHSS, Batera	Batera Bisham Road, Batera									North Waziristan	35
31	1	1	31	31			Kolai Palas	Palas	GGHS, Palas	Ziarat Road, Palas									Nowshera	5
31	1	1	31	31			Kolai Palas	Palas	Wild life Building, Palas	Ziarat Road, Palas									Orakzai	23
4	1	1	4	4			Charsadda	Charsadda	GPG College Charsadda	Prang Road Charsadda									Peshawar	3
4	1	1	4	4			Charsadda	Shabqadar	GD College Shabqadar	Battagram Road, Shabqadar									Shangla	13
4	1	1	4	4			Charsadda	Tangi	GD College, Tangi	College Road Tangi									South Waziristan	34
5	1	1	5	5			Nowshera	Pabbi	Jozai Camp	Chirat Pabbi Road, Jalozai									Swabi	9
5	1	1	5	5			Nowshera	Nowshera	Government Technical College	Nowshera Mardan Road									Swat	12
5	1	1	5	5			Nowshera	Nowshera	Benazir Complex, Risalpur	Bara Banda link Road Risalpur, Nowshera.									Tank	33
5	1	1	5	5			Nowshera	Jehangira	GHS, Khairabad	Nizam Pur Road Khairabad									Torghar	29
15	1	1	15	15			Dir Lower	Adenzai	University of Malakand Ground	Chakdara Ramda/University Road
15	1	1	15	15			Dir Lower	Lal Qila	Govt Degree College, Lal Qila	College Road, Maidan
15	1	1	15	15			Dir Lower	Timergara	Govt Degree College Timergara	Maidan Road, Haji Abad, Timergara Road
15	1	1	15	15			Dir Lower	Samar Bagh	Govt Degree College, Samar Bagh	Samarbagh Timergara Road
15	1	1	15	15			Dir Upper	Wari	Govt Technical College Wari	Main Wari Bazar, Dir Chitral Road
15	1	1	15	15			Dir Upper	Dir	Sports Stadium Dir	Dir Chitral Road, Main Dir Bazar
15	1	1	15	15			Dir Upper	Sheringal	Shaheed Benazir Bhutoo University Ground	Dir Kumrat Road
16	1	1	16	16			Chitral Lower	Chitral	Polo Ground Chitral	Peshawar Chitral Road
16	1	1	16	16			Chitral Lower	Chitral	Govt Centennial Model School Ground	Shahi Masjid Road, Chitral
16	1	1	16	16			Chitral Lower	Drosh	Col Murad Stadium	Chitral Peshawar Road, Drosh
10	1	1	10	10			Buner	Daggar	Govt: Higher Secondary School Jowar	Main Barikot Daggar Road
10	1	1	10	10			Buner	Daggar	Govt: Higher Secondary School Jawkhela	Daggar Pir Baba Road
10	1	1	10	10			Buner	Gagra	Govt Higher Secondary School Gagra	Gagra Tehsil, Road
10	1	1	10	10			Buner	Gagra	Govt Degree College Daggar,	Dewana Baba Road
10	1	1	10	10			Buner	Mandanr	Captain Waqas Shaheed Stadium, Mandanr	Chamla Road, Mandanr
12	1	1	12	12			Swat	Babuzai	Govt: Jehanzeb College, Mingora	Saidu Sharif Road, Mingora
12	1	1	12	12			Swat	BariKot	Govt: Higher Secondary School, Barikot	Peshawar Mingora Road, Barikot
12	1	1	12	12			Swat	Bahrain	Govt: High and Higher Secondary School, Kalam	Tehsil Road, Kalam
12	1	1	12	12			Swat	Bahrain	Govt High School Bahrain	Tehsil Road, Bahrain
12	1	1	12	12			Swat	Bahrain	Govt: higher Secondary School, Madyan	School Road Madyan
12	1	1	12	12			Swat	Kwazakhela	Govt Degree College Madyan	Madyan Mingora Road
12	1	1	12	12			Swat	Matta	Govt: Post Graduate College Matta	Matta Mingora road
12	1	1	12	12			Swat	Kabal	Govt: Higher Secondary School, Kabal	Police Line Kabal
12	1	1	12	12			Swat	Kabal	Govt: Dr. Khan Shaheed Degree College, Kabal	Kabal Mingora Road
13	1	1	13	13			Shangla	Alpuri	Govt: Degree College, Alpuri	College Road, Alpuri
13	1	1	13	13			Shangla	Alpuri	Govt: High School, Derai	Alpuri Bisham Road, Derai
13	1	1	13	13			Shangla	Alpuri	Govt: Higher Secondary School and Primary school, Shahpur	Shahpur Karora Road, Shahpur
13	1	1	13	13			Shangla	Alpuri	Govt: High School, Kuz Kana	Shahpur Karora Road, Kuz Kana
13	1	1	13	13			Shangla	Alpuri	Govt: High School, Karora	Alpuri Bisham Road, Karora
13	1	1	13	13			Shangla	Bisham	Govt Higher Secondary School, Botyal	Kurakuram highway, Bisham
13	1	1	13	13			Shangla	Bisham	KDP Ground, Botyal	Kurakuram highway, Bisham
13	1	1	13	13			Shangla	Puran	Govt Degree College Puran	Yakh Tangi Puran road
13	1	1	13	13			Shangla	Puran	Govt High School, Puran	Yakh Tangi Puran road
13	1	1	13	13			Shangla	Chakesar	Govt: High School, Chakesar	Karora Chakesar, road
13	1	1	13	13			Shangla	Chakesar	Govt Degree College, Chakesar	Karora Chakesar, road
38	1	1	38	38			Bannu	Bannu	Bannu Sugar Mill	Bannu-D.I.Khan Road
38	1	1	38	38			Bannu	Domain	Kashu Bridge	Indus High Way Bannu Link Road
38	1	1	38	38			Bannu	Domain	Govt Degree College. Landi Jalandar	Peshawar D.I.Khan Road
38	1	1	38	38			Bannu	Domain	Govt: Degree College Spina Tangi	Kohat Bannu Road
38	1	1	38	38			Bannu	Baka Khel	TDP Camp Baka Khel	Miranshah Road Baka Khel
32	1	1	32	32			D.I.Khan	D.I.Khan	Sports Complex D.I.Khan	Bannu Road D.I.Khan
32	1	1	32	32			D.I.Khan	D.I.Khan	Gomal Medical College Ground:	Drabin Road D.I.Khan
32	1	1	32	32			D.I.Khan	Kulachi	Sports Stadium Kulachi	Kachri near Kulachi D.I.Khan Road
32	1	1	32	32			D.I.Khan	Parao	Sports Stadium Parao	Indus High Way Parao
32	1	1	32	32			D.I.Khan	PaharPur	Govt: Degree College, Paharpur	Pahar Pur D.I.Khan Road
35	1	1	35	35			North Waziristan	Datta Khel	Datta Khel Camp Near Newly Constructed Tehsil Building	Miran Shah Datta khel Road
35	1	1	35	35			North Waziristan	Miranshah	Govt post graduate college Miranshah	Mivali Miran Shah Road
35	1	1	35	35			North Waziristan	Mirali	Govt Degree College	Miran Shah Road Mirali
35	1	1	35	35			North Waziristan	Mirali	Govt Elementary Teacher Traning college	Miran Shah Road Mirali
36	1	1	36	36			LakkiMarwat	Lakki Marwat	Govt High Centennial Model School	Kacheri Road, Lakki City
36	1	1	36	36			LakkiMarwat	LakkiMarwat	Govt Post Graduate College Lakki Marwat	Mian Wali Road, Lakki City
36	1	1	36	36			LakkiMarwat	LakkiMarwat	Govt Degree College Landiwah	Landiwah Indus Highway Link Road
36	1	1	36	36			LakkiMarwat	LakkiMarwat	Govt High Secondary School Landiwah	Landiwah Indus Highway Link Road
33	1	1	33	33			Tank	Tank	Govt Higher Secondary school Gomal Bazar	Gomal Tank Road, Gomal
33	1	1	33	33			Tank	Tank	Govt Degree College Tank	Tank D.I. Khan Road
33	1	1	33	33			Tank	Tank	Muhajr Camp Near Army Fort	Tank South Waziristan Road
33	1	1	33	33			Tank	Tank	Jehaz Ground Tank City	D.I. Khan Tank Road
33	1	1	33	33			Tank	Tank	Govt Degree College Amakhel Tank	Indus Highway Link Rd, Tank
8	1	1	8	8			Mardan	Mardan	Govt Post Graduate College Mardan	College Chowk Mardan, Mardan-Nowshera Road
8	1	1	8	8			Mardan	Mardan	Military Diary Farm Mardan	Mardan Charsadda Road
8	1	1	8	8			Mardan	Mardan	Govt Degree College, Toru	Toru Marhati Banda Road, Toru, Mardan
8	1	1	8	8			Mardan	Katlang	Govt Degree Coolege for Girls, Sawaldher, Mardan	Rustam Katlang, Mardan
8	1	1	8	8			Mardan	Katlang	Govt Degree College Katlang	Katlang Mardan Road, Katlang
8	1	1	8	8			Mardan	Rustam	Sports Complex, Rustam	Buner Rustam Road, Rustam
8	1	1	8	8			Mardan	Rustam	Govt Girls Degree College, Rustam	Rustam Mardan Road, Rustam
8	1	1	8	8			Mardan	Rustam	Govt Degree College Khair Abad, Rustam	Rustam Mardan Road, Khair Abad
8	1	1	8	8			Mardan	Takht Bhai	Govt Degree College, Takhtbhai	Charsadda Takhtbhai Road, Takhtbhai
8	1	1	8	8			Mardan	Takht Bhai	Govt Degree College, Lund Khwar	Lund Khwar, Shergarh Road, Lund Khwar
8	1	1	8	8			Mardan	Thakht Bhai	Govt Higher Secondary School, Hathian	Shergarh Hathian Road, Hathian
9	1	1	9	9			Swabi	Topi	Govt High School, Topi	Zaida Topi Road, Topi, Swabi
9	1	1	9	9			Swabi	Topi	Govt Girls Degree College Topi	Zaida Road Marghuz, Swabi
9	1	1	9	9			Swabi	Lahor	University of Swabi	Univeristy Road, Swabi
9	1	1	9	9			Swabi	Lahor	Govt Degree College, Lahor	Swabi-Jehangira Road, Swabi
9	1	1	9	9			Swabi	Razzar	Govt Degree College Yar Hussain	Swabi Mardan Road, Swabi
9	1	1	9	9			Swabi	Razzar	Govt. Degree College, Shewa	College Road, Shewa, Swabi
9	1	1	9	9			Swabi	Swabi	Govt Polytechnic Institute Shahmansoor	Swabi Jehangira Road, Swabi
9	1	1	9	9			Swabi	Swabi	Baja Sports Complex	Swabi Topi Road
34	1	1	34	34			South Waziristan	Ladha	Govt Degree College, Ladha	Makin Wana Road, Ladha, South Waziristan
34	1	1	34	34			South Waziristan	Sarwakai	Moula Khan Surai Hospital, Sarwakai	Jandola Wana Road, Sarwakai, South Waziristan
34	1	1	34	34			South Waziristan	Wana	Wana Cricket Stadium & Adjacent Area	Makin Road, Wana, South Waziristan
3	1	1	3	3			Peshawar	Peshawar	Govt Degree College Naguman	Naguman Charsadda Road, Peshawar
3	1	1	3	3			Peshawar	Peshawar	Zamung Kor	Khazana, Charsadda Road, Peshawar
3	1	1	3	3			Peshawar	Peshawar	Govt Girls Degree College, Chagharmatti	Landi Sarak Charsadda Road, Peshawar
6	1	1	6	6			Mohmand	Halimzai	Govt Higher Secondary School, Ghalanai	Colony Road Ghalanai Headquarter, Mohmand
6	1	1	6	6			Mohmand	Halimzai	Sports Complex Ghalanai	Main Bajaur Mohmand Road, Mohmand
6	1	1	6	6			Mohmand	Halimzai	Govt Degree College Chanda	Dawat Kor Road Chanda, Ghalanai, Mohmand
6	1	1	6	6			Mohmand	Ekka Gund	Govt: Degree College, Ekka Ghund	Shabqadar Road Ekka Ghund, Mohmand
6	1	1	6	6			Mohmand	Safi	Govt Degree College, Lakaro	Bajaur Mohmand Road Lakaro, Mohmand
6	1	1	6	6			Mohmand	Safi	Tehsil Headquarter Hospital, Mamad Gut	Mamad Gut Chamarkand Road, Mohmand
7	1	1	7	7			Khyber	Bara	Govt Degree College, Kohi Sher Haider	Tera Bara Road, Khyber
7	1	1	7	7			Khyber	bara	Govt Girls Higher Secondary School, Kalanda, Aka Khel	FR Road Bara, Khyber
7	1	1	7	7			Khyber	Jamrud	Jamrud Cricket Ground	Peshawar Janrud Road, Khyber
7	1	1	7	7			Khyber	Landikotal	Govt Degree College, Landi Kotal & Adjucent Rehman Baba Tomb Ground	Peshawar Landikotal Road
36	1	1	36	36			LakkiMarwat	Sarai Naurang	Govt: Degree College, Sarai Naurang	Bannu Naurang Road
18	1	1	18	18			Bajaur	Khar	Sports Complex, Khar	Nawagai Khar Road, Khar, Bajaur
18	1	1	18	18			Bajaur	Khar	Govt: Degree College, Khar	Munda Khar Road, Khar, Bajaur
18	1	1	18	18			Bajaur	Nawagai	Govt Degree College, Nawagai	Mohmand Nawagai Road, Nawagai, Bajaur
18	1	1	18	18			Bajaur	Mamund	Govt Degree College Bar khalozai	Khar Mamund Road, Mamund, Bajaur
18	1	1	18	18			Bajaur	Mamund	Govt: high School, Bar Kalozai	Khar Mamund Road, Mamund, Bajaur
18	1	1	18	18			Bajaur	Barang	Govt High School, Ghani Adai	Khar Barang Road, Khar, Bajaur
17	1	1	17	17			Chitral Upper	Mastuj	Govt Girls Degree College, Booni	Main Chitral Booni Road, Booni, Chitral
17	1	1	17	17			Chitral Upper	Mastuj	Govt: Boys Degree College Booni	Main Chitral Booni Road, Booni, Chitral
17	1	1	17	17			Chitral Upper	Mastuj	Ghali Ground, Mastuj	Main Chitral Booni Road, Booni, Chitral
21	1	1	21	21			Kohat	Kohat	Qila Ground, Kohat	Peshawar Chowk, Kohat
21	1	1	21	21			Kohat	Kohat	Govt Post Graduate College, Kohat	Collge Road, Kohat
21	1	1	21	21			Kohat	Lachi	Govt Girls Degree College, Lachi	Indus Highway, Lachi
23	1	1	23	23			Orakzai	Upper Orakzai	Govt Degree College Ghiljo	Ghiljo Khadizai Road, Orakzai
23	1	1	23	23			Orakzai	Upper Orakzai	Sports Stadium Ghiljo	Ghiljo Dabari Road, Orakzai
23	1	1	23	23			Orakzai	Lower Orakzai	Kalaya Sports Ground	Kalaya Ghiljo Road, Orakzai
19	1	1	19	19			Hangu	Hangu	Sports Complex, Hangu	Hangu Thall Road, Hangu
19	1	1	19	19			Hangu	Hangu	Govt Degree College, Hangu	Hangu Thall Road, Hangu
19	1	1	19	19			Hangu	Hangu	Govt Girls Degree College & Adjacent Railway Ground, Hangu	Bypass Road, Hangu
19	1	1	19	19			Hangu	Hangu	Khwaja Khizar (Forest Land)	Kohat Hungu Road, Hangu
19	1	1	19	19			Hangu	Tall	Govt Higher Secondary School, Doaba	Hangu Thall Road, Doaba, Hangu
19	1	1	19	19			Hangu	Tall	Govt Degree College, Tall	Hangu Thall Road, Tall, Hangu
22	1	1	22	22			Kurram	Upper Kurram	Govt Degree College, Parachinar	Sadda Parachinar Road, Parachinar, Kurram
22	1	1	22	22			Kurram	Upper Kurram	Sports Complex Parachinar	Sadda Parachinar Road, Parachinar, Kurram
22	1	1	22	22			Kurram	Upper Kurram	Sports Stadium Parachinar	Karakhela Stadium Road, Kurram
22	1	1	22	22			Kurram	Upper Kurram	Cricket Ground, Sadda	Tablighi Markaz Road, Sadda, Kurram
22	1	1	22	22			Kurram	Upper Kurram	Govt High School, Alizai	Thall Sadda Road, Alizai, Kurram
22	1	1	22	22			Kurram	Central Kurram	Govt High School, Dogar	Dogar Sadda Road, Dogar Kurram
20	1	1	20	20			Karak	Karak	Govt Girls Centennial Model Higher Secondary School, Karak	Bannu Karak Road, Karak
20	1	1	20	20			Karak	Karak	Govt Post Graduate College, Karak	Bannu Karak Road, Karak
20	1	1	20	20			Karak	Takht e Nasrati	Takht- e- Naarati Sports Complex	Takht-e-Nasarati Main Bazar, Karak
20	1	1	20	20			Karak	Takht e Nasrati	Govt Degree College, Takht-e-Nasarati	Takht-e-Nasarati Road Leading to Indus Highway, Karak
20	1	1	20	20			Karak	Banda Daud Shah	Govt Degree College, Banda Daud Shah	Bannu Kohat Road, Ahmadi Banda, Karak
20	1	1	20	20			Karak	Banda Daud Shah	Govt Girls Degree College Banda Daud Shah	Bear Teri Chowk Main Bannu-Kohat Road, Karak
14	1	1	14	14			Malakand	Batkhela	Govt: Degree College, Totakan	Batkhela Totakan Road, Totakan, Malakand
14	1	1	14	14			Malakand	Batkhela	Govt Higher Secondary School, Khar	Babi Koto Link Road Totakan Batkhela Road, Malakand
14	1	1	14	14			Malakand	Batkhela	Zafar Park Batkhela	Main Mingora Road, Batkhela, Malakand
14	1	1	14	14			Malakand	bathela	Govt: Degree College, Thana	College Road Thana, Malakand
14	1	1	14	14			Malakand	Dargai	Govt: Post Graduate College, Dargai	College Road, Dargai, Malakand
14	1	1	14	14			Malakand	Dargai	Govt: Higher School Heroshah	Harichand Dargai Road, Heoshah, Malakand
14	1	1	14	14			Malakand	Dargai	Govt: Degree College, Badraga	Badraga Jahazoono Dag Road, Badraga, Malakand
14	1	1	14	14			Malakand	Dargai	Govt: Higher Secondary School, Sakhakot	Hospital Road, Sakhakot, Malaknd
25	1	1	25	25			Abbottabad	Abbottabad	Govt: High School No 3 Abbottabad	Eidgah Road, Abbotabad
25	1	1	25	25			Abbottabad	Abbottabad	Govt: Post Graduate College No 1 Abbottabad	College Road, Abbotabad
25	1	1	25	25			Abbottabad	Abbottabad	Cricket Stadium Nawan shehr, Abbottabad	Murre Road, Abbotabad
25	1	1	25	25			Abbottabad	Abbottabad	Cricket Ground Township Nawan Shehr	Township Road Mandrach Nalai, Abbotabad
25	1	1	25	25			Abbottabad	Abbottabad	Govt: Post Graduate College, Mandian	Colleg Road Mandian, Abbotabad
25	1	1	25	25			Abbottabad	Havelian	Govt Degree College, Havelian	Kiala Road Havelian, Abbotabad
25	1	1	25	25			Abbottabad	Havelian	Abbottabad University of Science & Technology, Havelian	Captain Akaash Rabbani Shaheed Road, Havelian, Abbottabad
27	1	1	27	27			Haripur	Haripur	Pak China Fertilizer Colony, Haripur	Hatar Road Near Kot Najib Ullah, Haripur
27	1	1	27	27			Haripur	Haripur	Afghan Refugee Camp Basso Road	Sarikot Link Road Basso, Haripur
27	1	1	27	27			Haripur	Haripur	Govt High School, Panian	Main GT Road, Panian, Haripur
27	1	1	27	27			Haripur	Haripur	Padhana Camp Site	Padhana Road Near Tarbela Jeal, Haripur
27	1	1	27	27			Haripur	Ghazi	WAPDA Ground (Infront of AC Office)	Serikot Ghazi Road, Haripur
27	1	1	27	27			Haripur	Ghazi	Govt Degree College, Ghazi	Ghazi Hamlet Road, Haripur
27	1	1	27	27			Haripur	Ghazi	Sports Stadium Hussan Pur	Tarbela Road Hussan Pur, Haripur
27	1	1	27	27			Haripur	Ghazi	Govt High School, Ghazi	Tarbela Ghazi Road, Haripur
27	1	1	27	27			Haripur	Khanpur	Govt High School, Khan Pur	Khanpur Haripur Road, Haripur
27	1	1	27	27			Haripur	Khanpur	Govt: Degree College Khanpur	GT Road Jabbri, Haripur

[truncated: 4 more sheets: Contacts, Quick Links, Multilangual, Dashboard Data Storage]
