# Supplementary material for: Testing and evaluation of Pakistan’s pioneer disaster risk communication app: a case study of PDMA Madadgar android-based app
Source: Frontiers journal article supplement (doi:10.3389/fcomm.2025.1572206), 2025-06-26
Supplement: Table_2.xlsx [file Table_2.xlsx]

## Sheet: ProjectTaskList
Alpha and Beta Testing Results	Numbers Reported/ Suggested	Remarks/Action	PRIORITY	% COMPLETE	DONE	NOTES
					0
App crashes on Andriod below 8.0	5	Update compatibility by supporting older SDK versions	HIGH	1	1	Crowd Source with students for more devices
Slow Notification	6	Optimize server response and push notification services	HIGH	1	1	Mass testing
Error in Registration	4	Implement and enhance form validation mechanisms	HIGH	1	1
Inconsistent Map Rendering	5	Improve GPS services and integrate better mapping APIs	HIGH	1	1	Aquire google map API
Report Freezing	8	Restrict and optimize uploaded image sizes.	HIGH	1	1	Maximum size less than 2 MB
Push Notifications	14	Update Firebase Cloud Messaging (SDK).	HIGH	1	1
Add feature for only register user to submit reports. Non regiter can still use app.	12	Update user flow and backend logic for report submission.	HIGH	1	1	Add test for declarion
Language	14	Add support for Urdu	MEDIUM	1	1	Pashto in future
Battery Drain	9	Optimize background processes and minimize resource usage.	MEDIUM	1	1
Inconsistent navigation with Tablets and Large screen	11	Test and enhance layouts for larger screen sizes.	HIGH	1	1	Check on multipel devices
Failure to load emergency contact information	5	Ensure emergency contact details are fetched and cached properly.	MEDIUM	1	1
Offline resources additions	12	Add downloadable offline resources functionality.	LOW	1	1
Font sizes and styling inconsistencies	3	Standardize font sizes and apply consistent styles across screens.	HIGH	1	1
Feedback on user report at backend	9	Implement a robust feedback tracking and reporting module in the backend.	HIGH	1	1
Slow loading times on some devices	5	Optimize app performance for low-end devices by reducing memory and CPU usage.	MEDIUM	1	1
Insecure data transmission	9	Implement end-to-end encryption for all transmitted data and JWT token	HIGH	1	1
Inconsistent API response	7	Debug and enhance API logic for consistent responses across endpoints.	HIGH	1	1
Add a checkbox for declaration statment	12	Include a mandatory checkbox with validation in the user interface.	MEDIUM	1	1
Notification settings on the web dashboard	14	Add a user-friendly interface for managing notification preferences	HIGH	1	1
Personalized emergency alerts (SOS Messages) for volunteers	12	Develop and integrate a personalized alert system with location-based notifications.	HIGH	1	1
Interactive public awareness content/visuals	8	Add multimedia content (e.g.infographics, Banners) to increase public engagement.	MEDIUM	1	1
Resoruces download facility from app and dashboard	5	Implement a feature to download resources in multiple formats (PDF, images, etc.).	LOW	1	1
Social sharing capabilities	7	Enable mobile number authentication	MEDIUM	1	1
Adding functionality for signing up with mobile number	12	Integrate file upload functionality for photo evidence submissions.	HIGH	1	1
Evidence attachment in complaint section	11	Integrate file upload functionality for photo evidence submissions.	HIGH	1	1
Add feature for updating data in settings	15	Allow users to edit profile and preferences directly in the settings.	MEDIUM	1	1
Adding a color background to the login and password section	9	Enhance the UI with improved theming and color options.	LOW	1	1	White color to diffrentiate it
Device fragmentation issues	8	Test and optimize the app across a wider range of devices and screen resolutions.	HIGH	1	1
App permission problems	4	Implement better permission management and request handling for smoother UX.	HIGH	1	1
Screen orientation and theme conflicts	7	Ensure compatibility with different orientations and resolve theme inconsistencies.	HIGH	1	1
Slow data speeds on some devices	5	Use caching and optimized queries to minimize data transfer delays.	HIGH	1	1	Check on multiple data operators
High latency, packet loss	12	Enhance server-side handling and integrate load balancing to reduce latency.	HIGH	1	1
Frequent disconnections	3	Implement retry logic and maintain session persistence during network interruptions.	HIGH	1	1
Data consumption	8	Optimize data usage by compressing resources and enabling selective downloads.	MEDIUM	1	1
Add use profile section in settings	7	Introduce a profile management section with user-specific settings and options.	MEDIUM	1	1
